# Supplementary material for: Multi-level remodelling of chromatin underlying activation of human T cells
Source: PubMed Central journal article supplement (PMC7804404; doi:10.1038/s41598-020-80165-9), 2021-01-12
Supplement: 41598_2020_80165_MOESM1_ESM.pdf [file 41598_2020_80165_MOESM1_ESM.pdf]

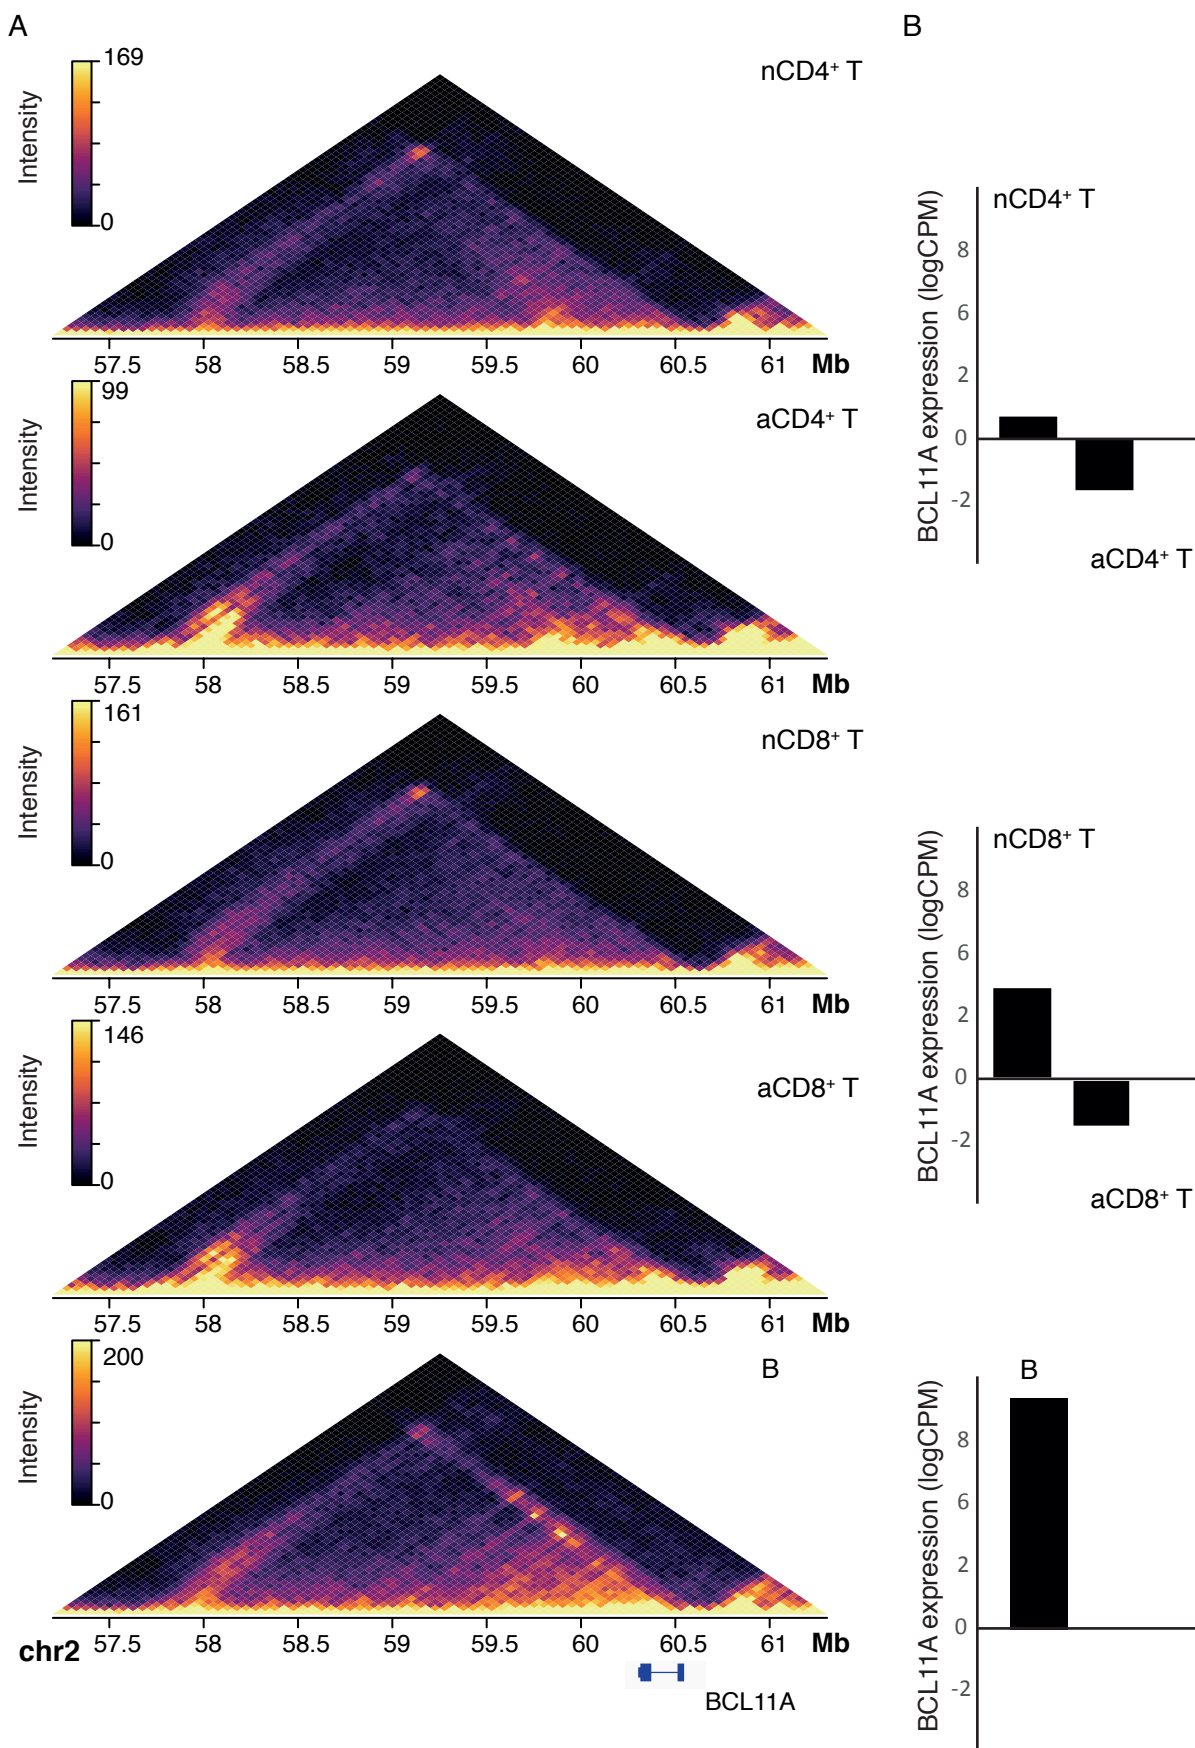

**Figure S1. Chromatin structure and gene expression are immune cell type-specific** (A) In-situ Hi-C contact matrices for a 2.5 Mb region on chromosome 2 that includes the BCL11A locus at 50 kbp resolution. The top four Hi-C matrices display data from resting and activated T cells with minimal genome organisation at the gene, while the bottom Hi-C matrix from B cells shows distinct genome organisation at the BCL11A locus. Color scale indicates number of reads per bin pair. (B) Bar plots showing the expression of BCL11A across resting and activated CD4<sup>+</sup> and CD8<sup>+</sup> T cells, and B cells.
