# Supplementary material for: Multi-level remodelling of chromatin underlying activation of human T cells
Source: PubMed Central journal article supplement (PMC7804404; doi:10.1038/s41598-020-80165-9), 2021-01-12
Supplement: 41598_2020_80165_MOESM6_ESM.pdf [file 41598_2020_80165_MOESM6_ESM.pdf]

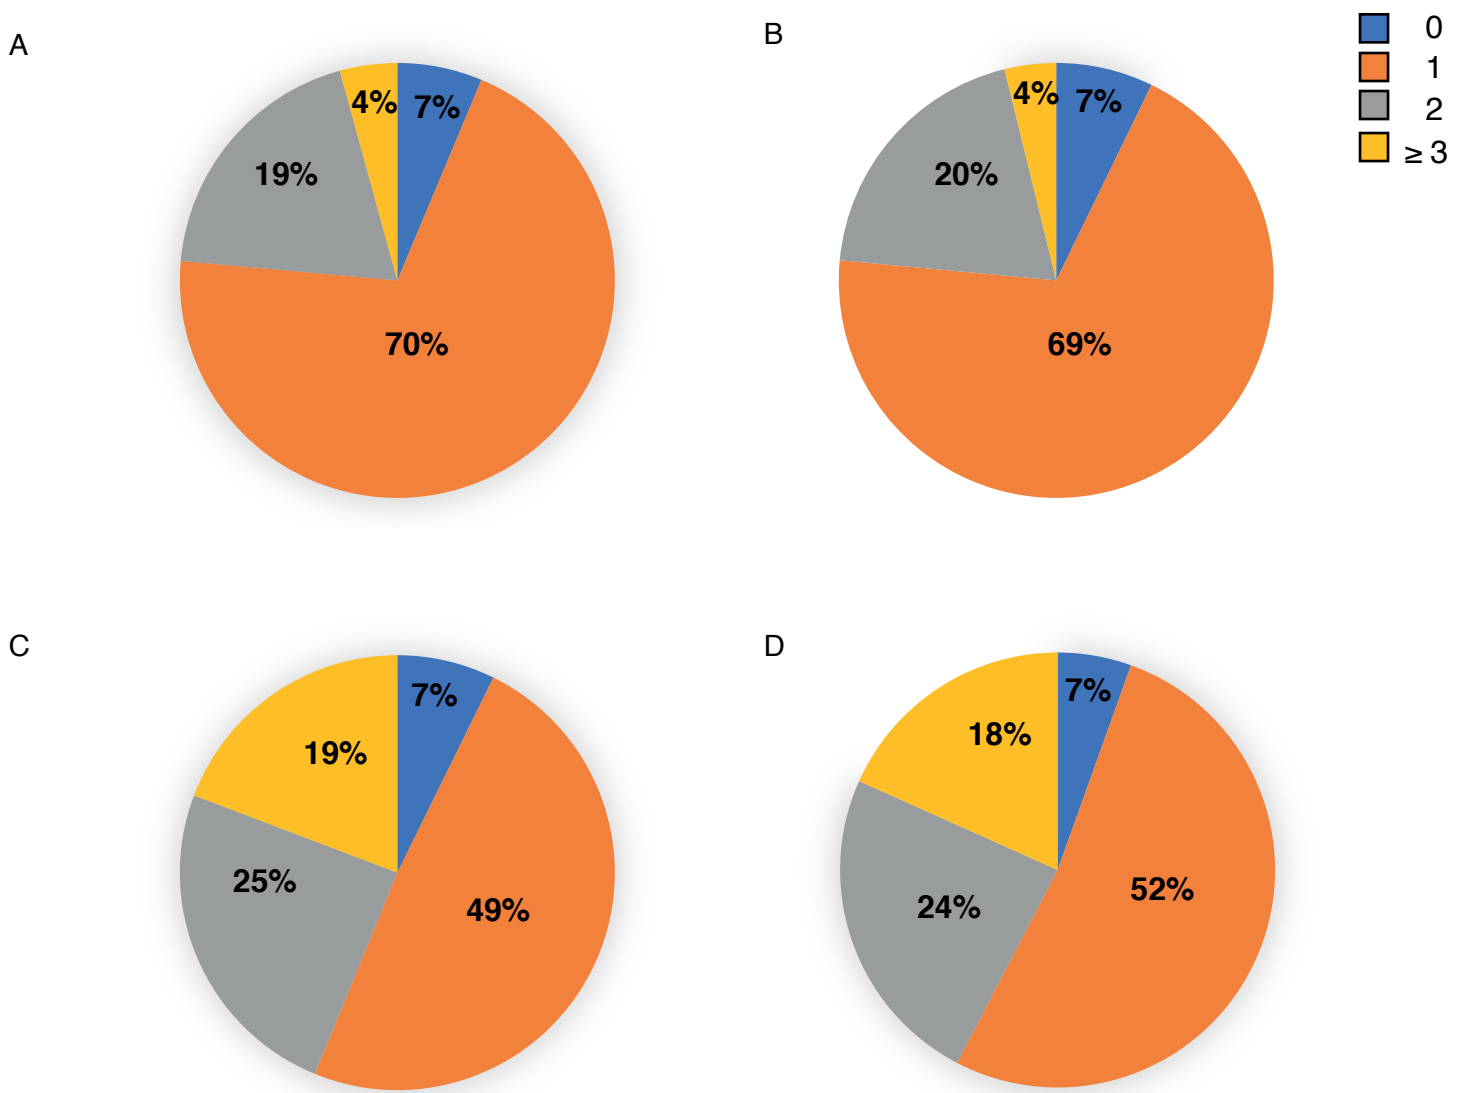

**Figure S6. T cell activation results in partitioning of genome topology.** Pie chart representation of the distribution of (A) TADs in resting CD4<sup>+</sup> T cells overlapping 0, 1, 2 or  $\geq 3$  TADs in resting CD8<sup>+</sup> T cells, (B) TADs in resting CD8<sup>+</sup> T cells overlapping 0, 1, 2 or  $\geq 3$  TADs in resting CD4<sup>+</sup> T cells (C) TADs in resting CD4<sup>+</sup> T cells overlapping 0, 1, 2 or  $\geq 3$  TADs in activated CD4<sup>+</sup> T cells, and (D) TADs in resting CD8<sup>+</sup> T cells overlapping 0, 1, 2 or  $\geq 3$  TADs in activated CD8<sup>+</sup> T cells.
